# Supplementary material for: An siRNA Screen Identifies the U2 snRNP Spliceosome as a Host Restriction Factor for Recombinant Adeno-associated Viruses
Source: PLOS journal article supplement (doi:10.1371/journal.ppat.1005082), 2015-08-05

**A**

|                 |    |                   |              |            |               |               |             |              |      |            |       |         |     |            |    |       |       |    |
|-----------------|----|-------------------|--------------|------------|---------------|---------------|-------------|--------------|------|------------|-------|---------|-----|------------|----|-------|-------|----|
|                 | 10 | 20                | 30           | 40         | 50            | 60            | 70          | 80           | 90   |            |       |         |     |            |    |       |       |    |
| Yeast RDS3p     | 7  | --LIM             | CLKQPGVQTGLL | CEKCDGKCPI | CDSYVRPKRKVRV | CENC          | SFGKQAKNCII | CNLNVGVNDAFY | CWEC | CRLGKDKDGC | PRILN | --107   |     |            |    |       |       |    |
| Mammalian PHF5A | 7  | --LIF             | CRKQAGVAIGRL | CEKCDGKC   | VI            | CDSYVRPCTLVRI | CDE         | CNYGSYQGR    | CVI  | CG         | GP    | GVSDAYY | CKE | CTIQEKDRDG | C  | PKIVN | --110 |    |
|                 |    | 11                |              | 23         | 26            | 30            | 33          |              | 46   | 49         |       | 58      | 61  |            | 72 | 75    |       | 85 |
|                 |    | Zn Finger 3 (ZF3) |              |            | ZF1           |               | ZF2         |              | ZF3  |            |       | ZF1     |     | ZF2        |    |       | ZF3   |    |

**B**

PHF5A  
(triquetra knot structure, based on RDS3p)

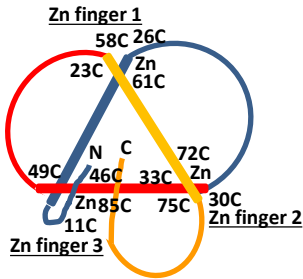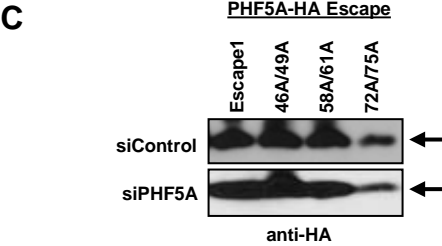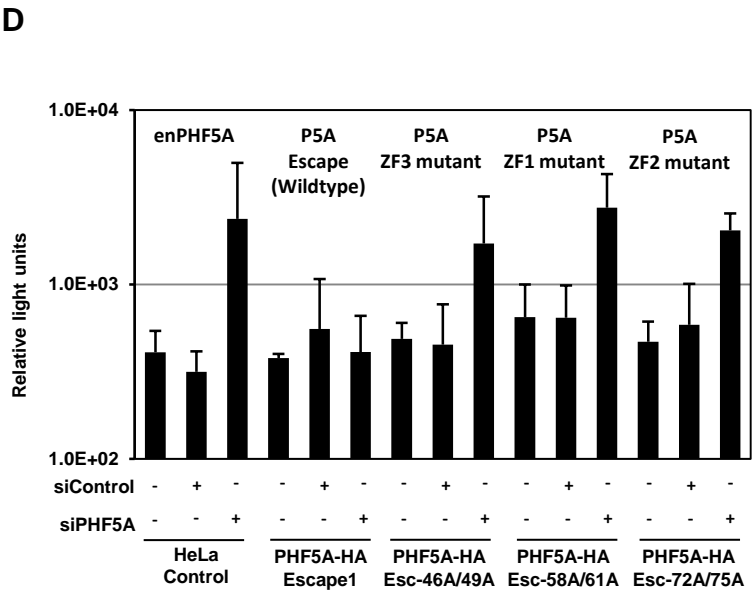

Supplement: S3 (10.1371/journal.ppat.1005082.s003) [file journal.ppat.1005082.s003]
